# Supplementary material
Source: PubMed Central journal article supplement (PMC6005439)
Supplement: supp_RA117.000834_133729_3_supp_130778_p82wff.pdf [file supp_RA117.000834_133729_3_supp_130778_p82wff.pdf]

## SUPPORTING INFORMATION

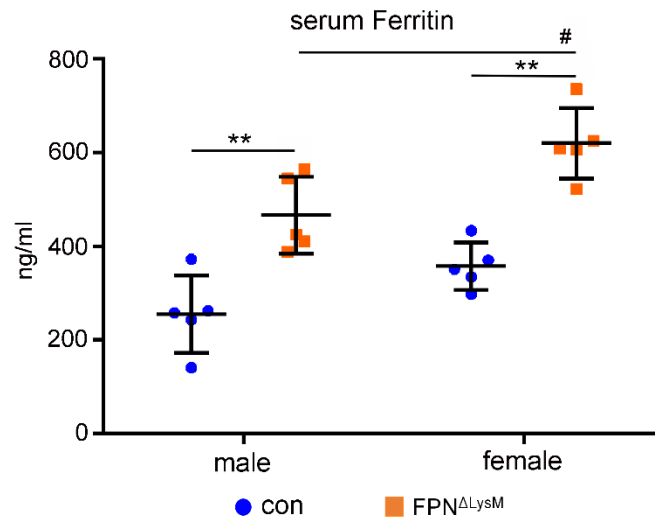

**Supplemental Figure 1. Loss of *Fpn* in myeloid cells in mice increases serum ferritin level.** Serum were collected from 2-month old control (con) and *Fpn* myeloid-deletion (*Fpn*<sup>ΔLysM</sup>) male and female mice. The ferritin level was measured using a Mouse Ferritin ELISA Kit from LifeSpan BioSciences, Inc. n = 5. \*\* p < 0.01 vs con; # p < 0.05 vs male by One-Way ANOVA.

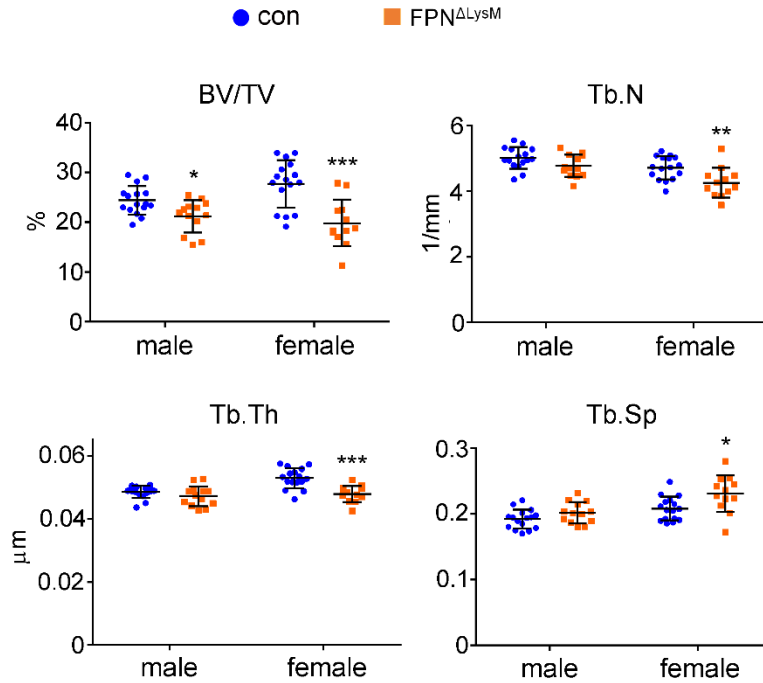

**Supplemental Figure 2. *Fpn*-deficiency in osteoclast precursors leads to decreased bone mass in lumbar vertebrae in mice.**  $\mu$ CT analysis of trabecular bone compartment of L4 vertebra of 2-month old control (con) and *Fpn*-cKO (*Fpn*<sup>ΔLysM</sup>) male and female mice (male, con n = 16, cKO n = 13; female, con n = 16, cKO n = 12). BV/TV, percentage of trabecular bone volume to tissue volume; Tb. N, trabecular number; Tb. Th, trabecular thickness; Tb.Sp, trabecular separation. \* p < 0.05, \*\* p < 0.01, \*\*\* p < 0.001 vs con by student *t*-test.

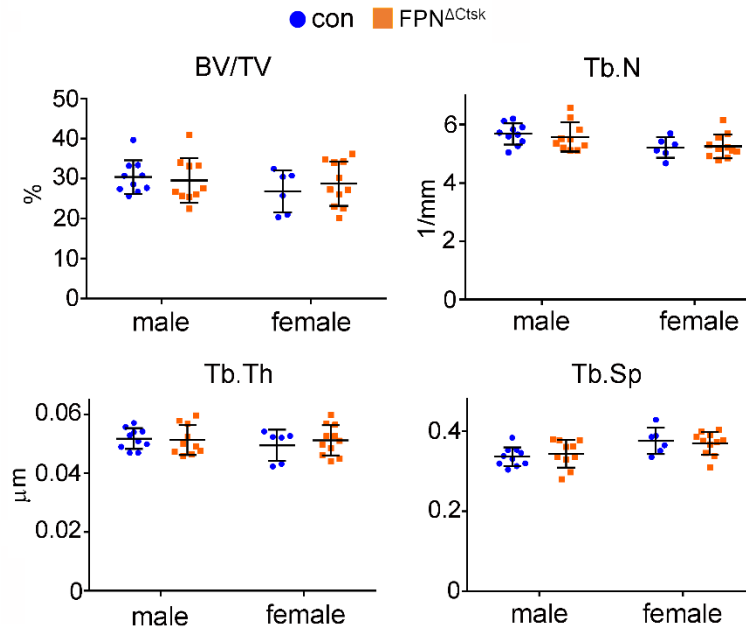

**Supplemental Figure 3. Loss of *Fpn* in mature osteoclasts has no effects on vertebral bone mass in mice.**  $\mu\text{CT}$  analysis of trabecular bone compartment of L4 vertebra of 2-month old con and  $FPN^{\Delta Ctsk}$  male and female mice (n = 9 for male con; n = 10 for male cKO; n = 6 for female con; n = 11 for female cKO). BV/TV, percentage of trabecular bone volume to tissue volume; Tb. N, trabecular number; Tb. Th, trabecular thickness; Tb.Sp, trabecular separation.

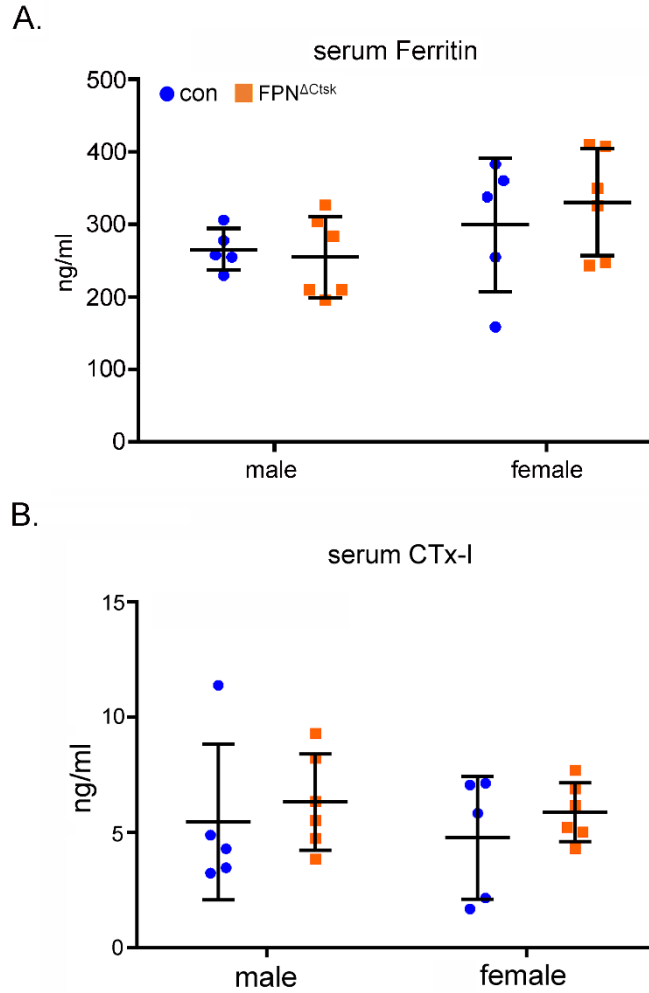

**Supplemental Figure 4. *Fpn*-deficiency in late stage of osteoclast differentiation has no effects on serum ferritin and CTx-I levels.** Serum were collected from 2-month old control (con) and *Fpn* osteoclast-deletion (*Fpn* $\Delta$ Ctsk, cKO) male and female mice. The ferritin level was measured using a Mouse Ferritin ELISA Kit from LifeSpan BioSciences, Inc. Serum CTx-I was detected by the RatLaps EIA kit from Immunodiagnostic systems. n = 5 for con and n = 6 for cKO.

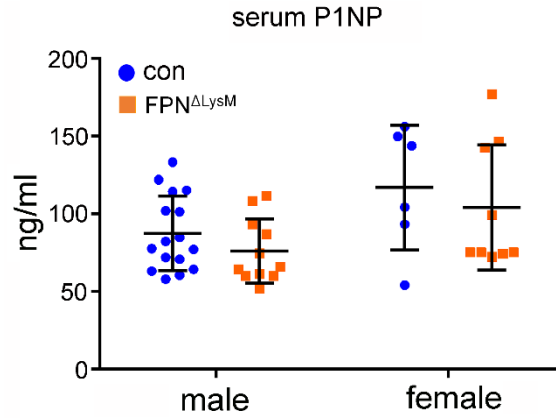

**Supplemental Figure 5. Deletion of *Fpn* in myeloid cells in mice has no impact on bone formation in both male and female mice.** The serum level of bone formation marker, PINP (amino-terminal propeptide of type I procollagen) in 2-month old control (con) and *Fpn*-myeloid deletion ( $FPN^{\Delta LysM}$ , cKO) mice, was measured by the Rat/Mouse PINP EIA kit from Immunodiagnosticsystems. n = 16 for male con; n = 11 for male cKO; n = 6 for female con; n = 9 for female cKO.

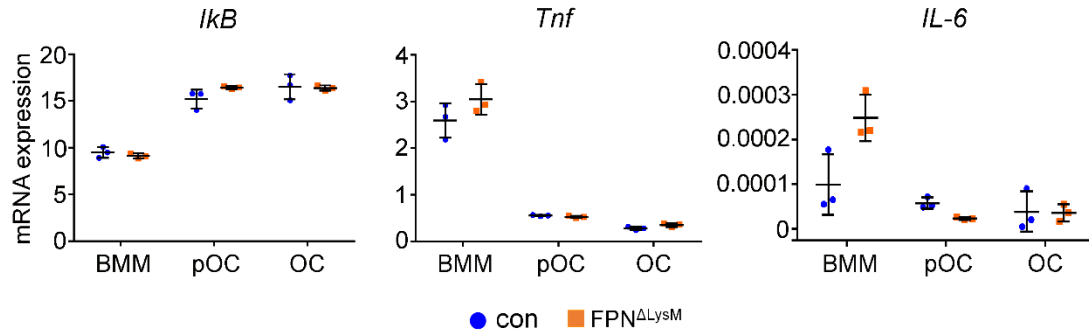

**Supplemental Figure 6. Loss of *Fpn* in osteoclast lineage cells had no effects on mRNA expression of NF- $\kappa$ B target genes.** Bone marrow monocytes isolated from control (con) and *Fpn* myeloid deletion ( $Fpn^{\Delta LysM}$ ) mice were cultured with M-CSF (BMM) or M-CSF + RANKL for two and four days to generate mononuclear pre-osteoclasts (pOC) and mature multinucleated osteoclasts (OC), respectively. Quantitative real-time PCR analysis of the mRNA expression of NF- $\kappa$ B targeting genes, *IkB*, *Tnf*, and *IL-6* was performed. n = 3. The data shown are representatives from three independent experiments.
